# Supplementary material for: Two novel tetraphenylethylene-skeleton salamo-type fluorescent probes: specific recognition of cyanide through different response patterns
Source: Royal Society of Chemistry journal article supplement (doi:10.1039/d1nj03608d), 2021-01-01
Supplement: d1nj03608d1.pdf [file d1nj03608d1.pdf]

## Supporting Information

### **Two novel tetraphenylethylene-skeleton salamo-type fluorescent probes: Specific recognition of cyanide through different response patterns**

Yin-Xia Sun\*, Zhuang-Zhuang Chen, Geng Guo, Ruo-Yu Li, Ting Zhang and Wen-Kui Dong\*

School of Chemistry and Chemical Engineering, Lanzhou Jiaotong University, Lanzhou, Gansu 730070, China

\*Corresponding author: Tel: +86 931 4938703; E-mail: dongwk@126.com.

#### *2.1. Materials and Measurements*

All raw materials are obtained from suppliers and used directly. The melting points were determined using SGW X-4A Shanghai Jingke Micro Melting Point Apparatus (Shanghai, China). <sup>1</sup>H NMR/<sup>13</sup>C NMR spectra were measured using a Bruker 500/126 MHz spectrometer with CDCl<sub>3</sub>/DMSO-d<sub>6</sub> as the solvent (Bruck, Germany). The IR spectrum of the target compound was recorded on a Vertex 70 FT-IR spectrophotometer, and KBr was used as a tablet (Bruck, Germany). The absorption and emission spectra were measured on UV-3900 and F-7000 FL spectrophotometers (Tokyo, Japan), respectively.

Preparation of anhydrous tetrahydrofuran (THF) solvent: Under the protection of nitrogen, benzophenone was selected as the indicator and sodium metal was used to remove water and dry. When the solvent system turns dark blue, it was collected and used after distillation (now steamed and used now).

---

\* School of Chemistry and Chemical Engineering, Lanzhou Jiaotong University, Lanzhou 730070, P. R. China.  
E-mail: sun\_yinxia@163.com; dongwk@126.com; Tel: +86 931 4938703

**Table S1.** Comparison of reported fluorescent probes for CN<sup>-</sup> with **TPES1** and **TPES2**.

| Probe                                                                               | LOD ( $\mu\text{M}$ ) | Response method                  | Response time | solvent                                   | Ref       |
|-------------------------------------------------------------------------------------|-----------------------|----------------------------------|---------------|-------------------------------------------|-----------|
| 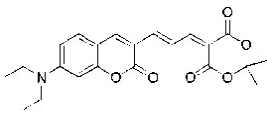   | 0.027                 | Ratiometric fluorescence         | 30 s          | Tris-HCl, 10%DMSO                         | 22(a)     |
|    | 0.0928                | Fluorescence turn-on             | -             | HEPES                                     | 22(b)     |
|    | 0.066                 | Fluorescence turn-on             | 100 s         | MeOH:HEPE, 1:1                            | 22(c)     |
|    | 0.017                 | Fluorescence turn-off            | < 30s         | DMF:H <sub>2</sub> O 7:3                  | 22(d)     |
|   | 0.0772                | Fluorescence turn-on             | < 60 s        | DMSO:H <sub>2</sub> O, 8:2                | 22(e)     |
|  | 0.00032               | fluorescence turn-off            | 12 min        | DMSO:PBS (4:1, pH = 7.4)                  | 22(f)     |
|  | 1.0                   | Fluorescence turn-on             | 3 min         | H <sub>2</sub> O:CH <sub>3</sub> CN, 7:3, | 22(g)     |
|  | 0.014                 | Fluorescence turn-on             | 240 s         | THF:H <sub>2</sub> O, 9:1                 | 22(h)     |
|  | 0.0856                | Ratiometric fluorescence turn-on | < 4s          | DMSO-H <sub>2</sub> O, 9:1                | This Work |
|  | 0.0573                | Fluorescence turn-on             | < 5s          | DMSO-H <sub>2</sub> O, 9:1                | This Work |



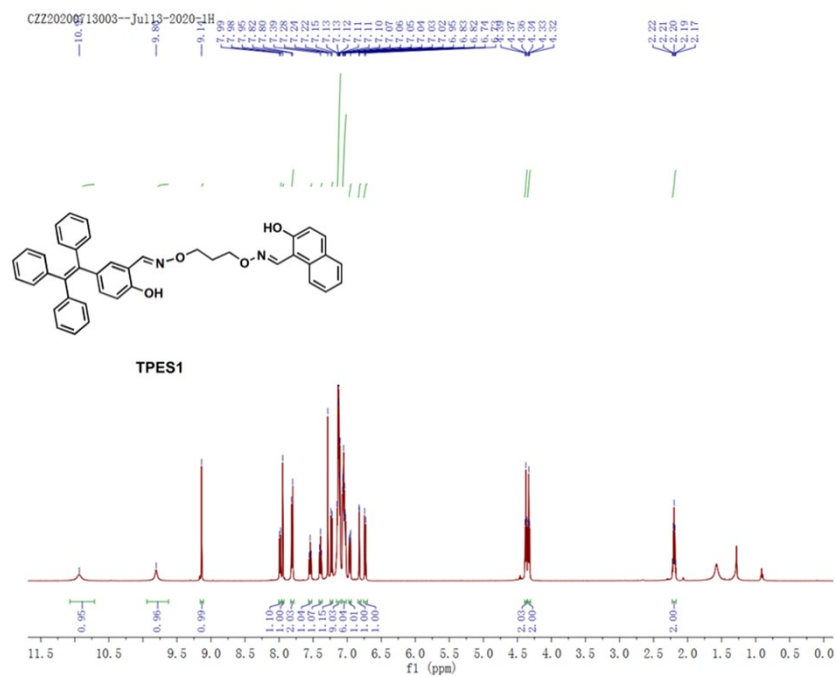

**Fig. S3**  $^1\text{H}$  NMR spectrum of probe **TPES1**.

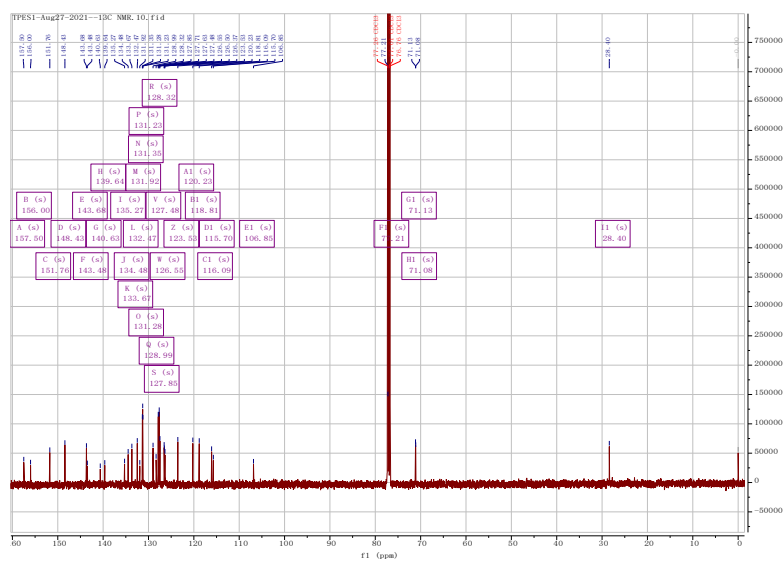

**Fig. S4**  $^{13}\text{C}$  NMR of **TPES1** in  $\text{CDCl}_3$ .  $^{13}\text{C}$  NMR (500 MHz, Chloroform-d)  $\delta$  157.50, 156.00, 151.76, 148.43, 143.68, 143.48, 140.63, 139.64, 135.27, 134.48, 133.67, 132.47, 131.92, 131.35, 131.28, 131.23, 128.99, 128.32, 127.85, 127.71, 127.63, 127.48, 126.55, 126.50, 126.37, 123.53, 120.23, 118.81, 116.09, 115.70, 106.85, 77.21, 71.13, 71.08, 28.40.

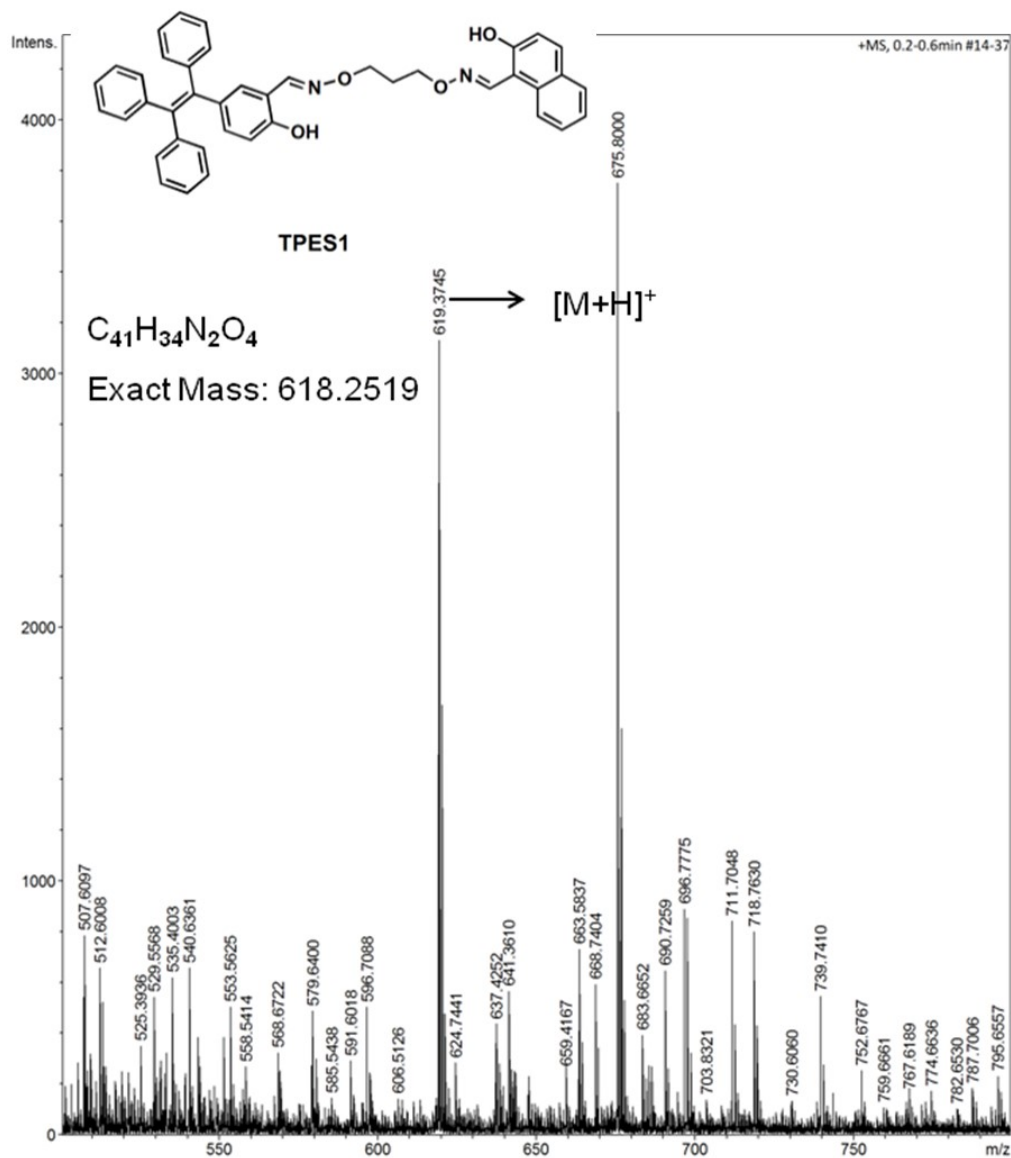

Fig. S5. Mass spectrum of the probe TPES1.



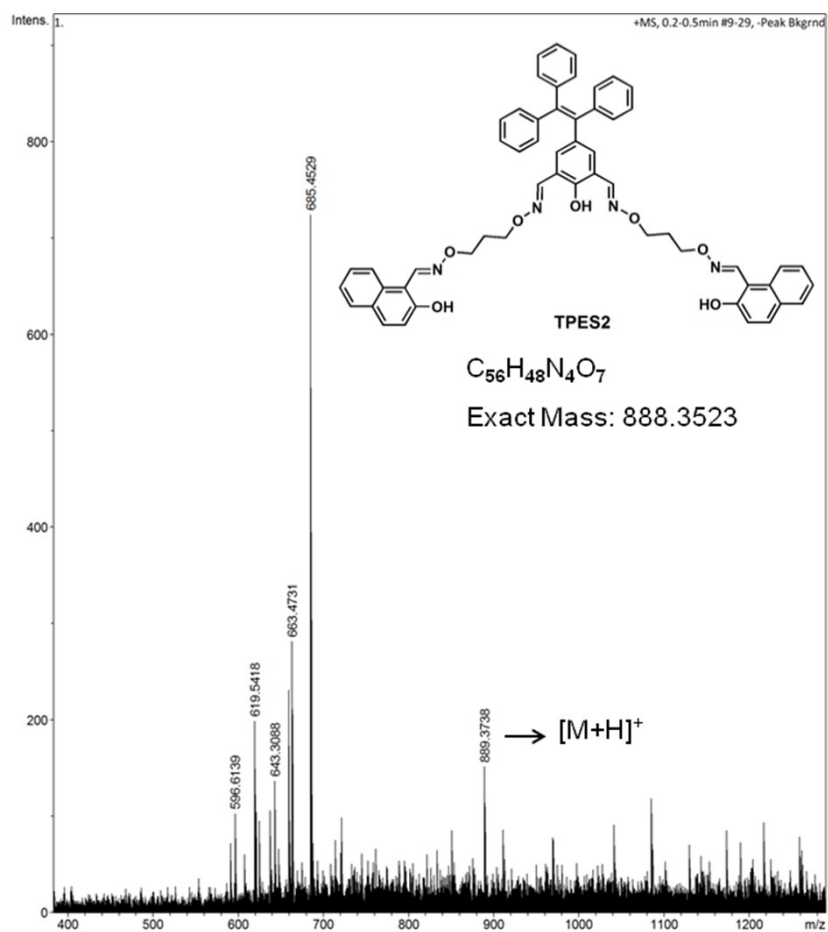

**Fig. S8.** Mass spectrum of the probe TPES2.

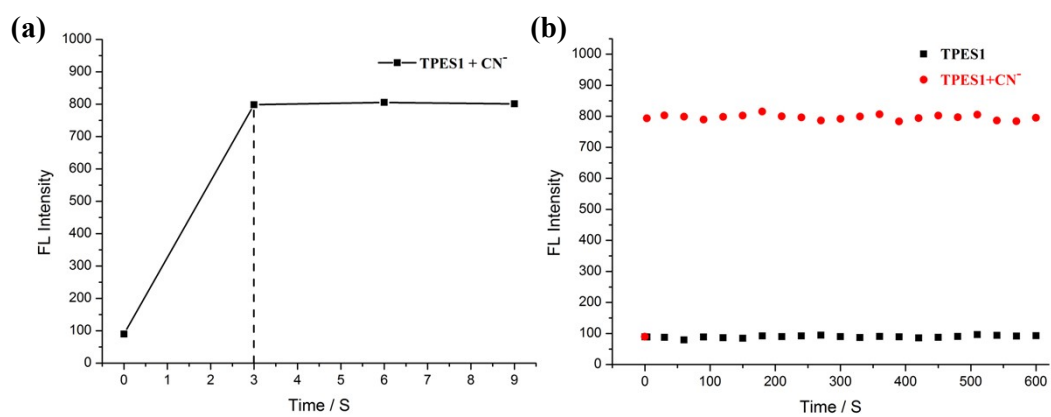

**Fig. S9** (a) Response time and (b) fluorescence stability of probe TPES1 towards  $CN^-$ .

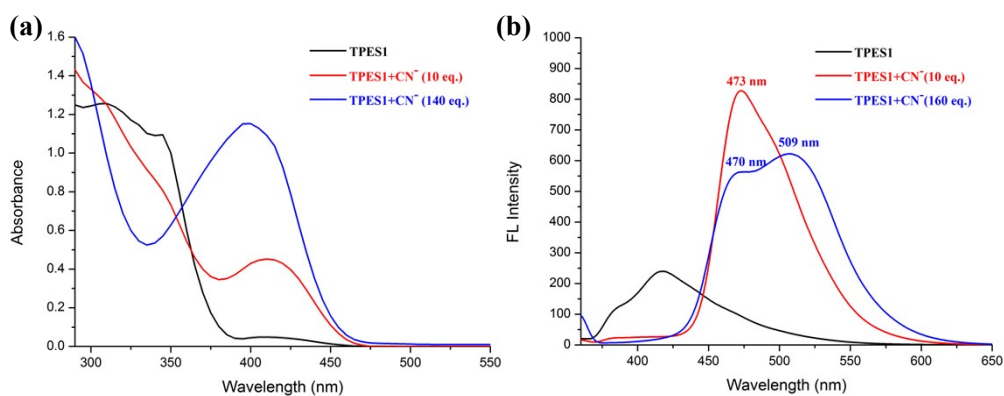

**Fig. S10** UV-Vis and fluorescence spectra of initial addition and titration end points.

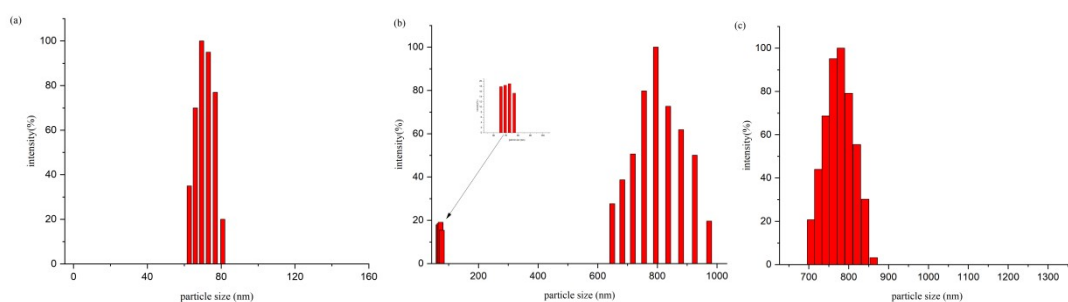

**Fig. S11** (a) TPES2 (b) TPES2 + 10 eq. CN<sup>-</sup>, (c) TPES2 + 160 eq. CN<sup>-</sup> dynamic light scattering experiments.

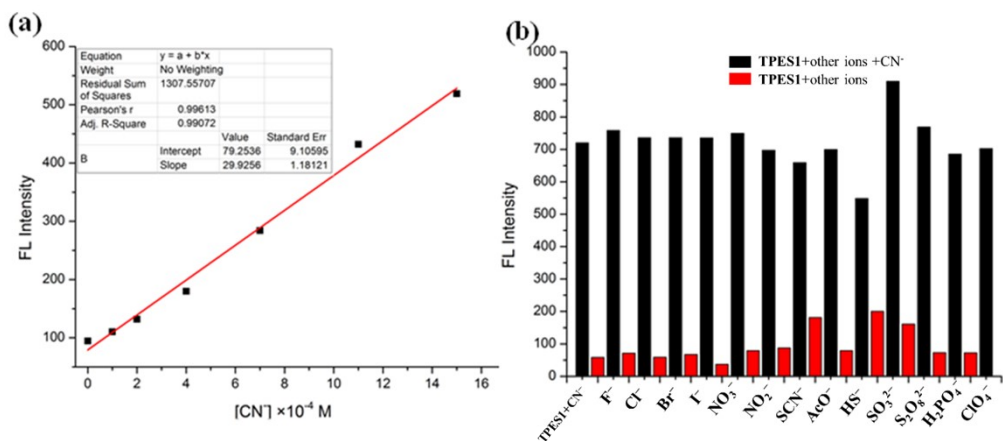

**Fig. S12** (a) The relationship between the fluorescence intensity (473 nm) and the CN<sup>-</sup> ion concentration ( $0-16.0 \times 10^{-4}$  M); (b) anti-interference experiment of probe **PETS1** (473 nm).



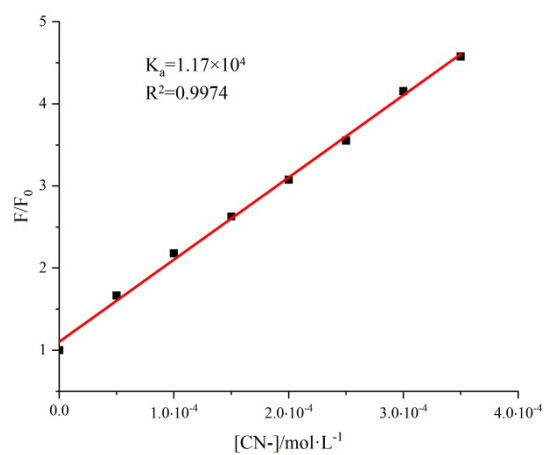

**Fig. S13** The binding constant curve after  $\text{CN}^-$  is added to **TPES1**

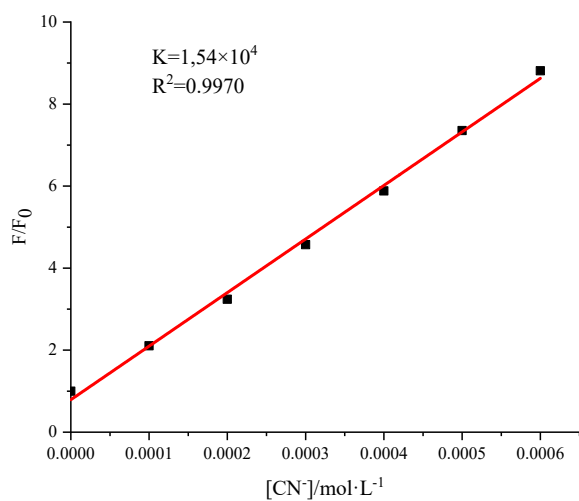

**Fig. S14** The binding constant curve after  $\text{CN}^-$  is added to **TPES2**

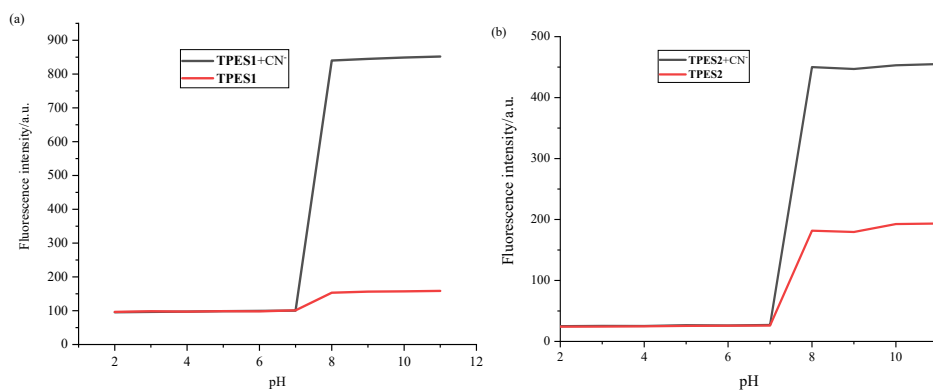

**Fig. S15** The fluorescence intensity of the probe (a) **TPES1** and (b) **TPES2** changed with pH after adding  $\text{CN}^-$ .

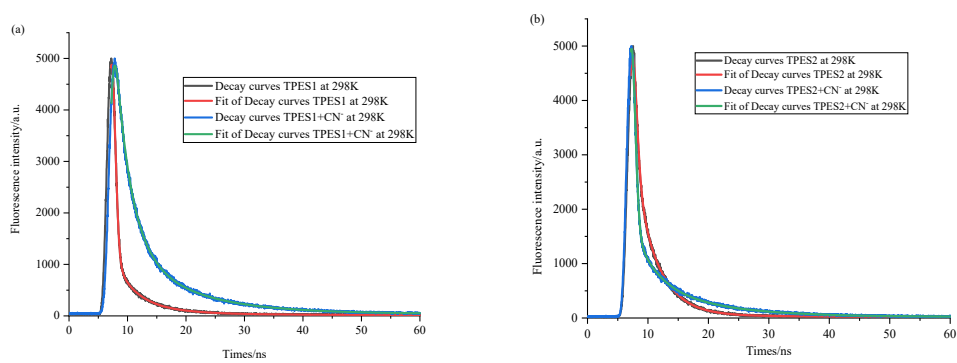

**Fig. S16** (a) TPES1 and TPES1+CN<sup>-</sup>, (b) TPES2 and TPES2+CN<sup>-</sup> fitting curve of fluorescence lifetime

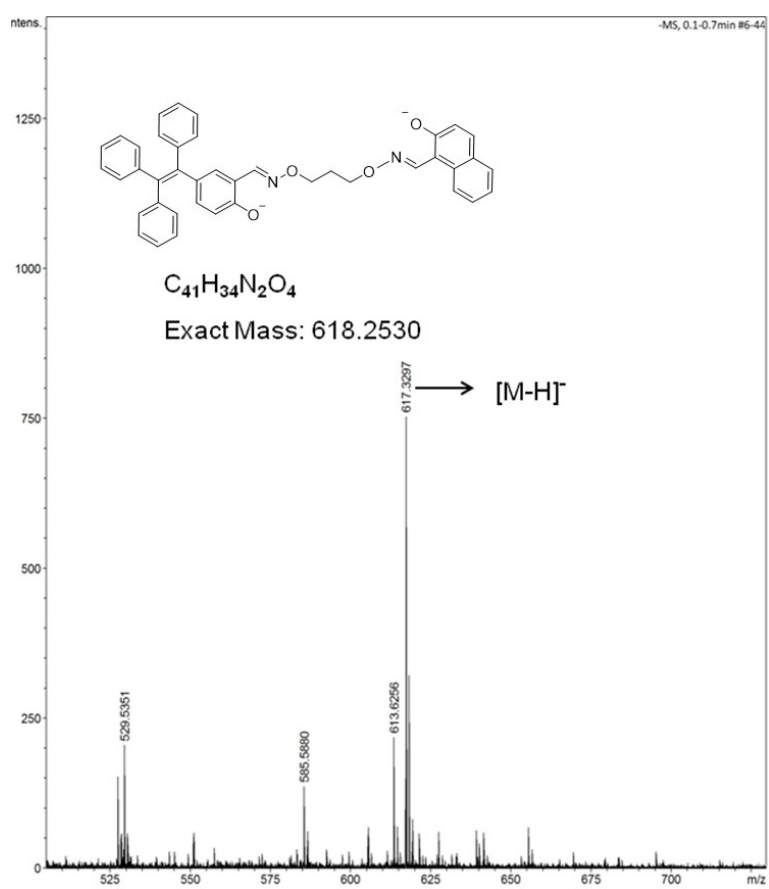

**Fig. S17** The mass spectrum of probe TPES1 and CN<sup>-</sup> after mixing for 15 minutes.

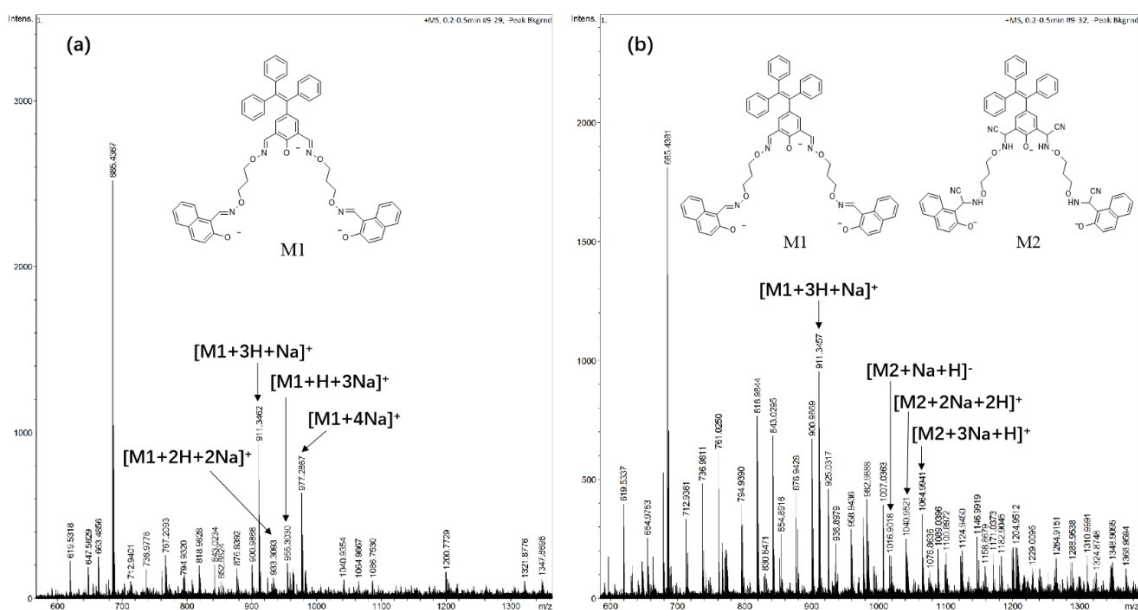

**Fig. S18** The mass spectra (a) measured immediately; (b) after mixing for 15 minutes after probe TPES2 and CN<sup>-</sup> are mixed.
